Comparison of the effects of methylene blue with adrenaline and Marcaine with adrenaline on pain control after hemorrhoidectomy  
Ramin Azhough MD<sup>1</sup>; Mohammad Reza Dashti<sup>2</sup> MD; Sahar Taher MD<sup>3</sup>; Pooya Jalali MD<sup>4</sup>

Keywords: Hemorrhoidectomy; Methylene Blue; Postoperative pain; Pain control

1. Assistant Professor of General Surgery, Tabriz University of Medical Sciences, Tabriz, Iran.
2. MD, Tabriz University of Medical Sciences, Tabriz, Iran.
3. MD, Islamic Azad University Tabriz Branch, Tabriz, Iran.
4. Basic and Molecular Epidemiology of Gastrointestinal Disorders Research Centre, Research Institute for Gastroenterology and Liver Diseases, Shahid Beheshti University of Medical Sciences, Tehran, Iran.

Article type: Original Article

Corresponding author: Pooya jalali

Mobile: +98 9187859587

Email: [pooya.jalali1995@gmail.com](mailto:pooya.jalali1995@gmail.com)

Iran, East Azerbaijan Province, Tabriz, Univesity Main St

The authors declare that they have no conflict of interest.

The authors have withdrawn their manuscript owing to Improve the article.  
Therefore, the authors do not wish this work to be cited as reference for the project.  
If you have any questions, please contact the corresponding author.
